# Supplementary material
Source: PubMed Central journal article supplement (PMC5514681)
Supplement: AEM.00380-17_zam999117960s1.pdf [file AEM.00380-17_zam999117960s1.pdf]

# Exploring a possible link between the intestinal microbiota and feed efficiency in pigs

Ursula M. McCormack<sup>1,2</sup>, Tânia Curião<sup>1</sup>, Stefan G. Buzoianu<sup>1</sup>, Maria L. Prieto<sup>2</sup>, Tomas Ryan<sup>1</sup>, Patrick Varley<sup>3</sup>, Fiona Crispie<sup>4,5</sup>, Elizabeth Magowan<sup>6</sup>, Barbara U. Metzler-Zebeli<sup>7</sup>, Donagh Berry<sup>8</sup>, Orla O'Sullivan<sup>4,5</sup>, Paul D. Cotter<sup>4,5</sup>, Gillian E. Gardiner<sup>2#</sup>, and Peadar G. Lawlor<sup>1</sup>

<sup>1</sup>Teagasc, Pig Development Department, Animal and Grassland Research and Innovation Centre, Moorepark, Fermoy, Co. Cork, Ireland; <sup>2</sup>Department of Science, Waterford Institute of Technology, Co. Waterford, Ireland; <sup>3</sup>Hermitage Genetics, Co. Kilkenny, Ireland; <sup>4</sup>Teagasc, Food Research Centre, Moorepark, Fermoy, Co. Cork, Ireland; <sup>5</sup>APC Microbiome Institute, Cork, Ireland; <sup>6</sup>Agri-Food and Biosciences Institute, Hillsborough, Northern Ireland; <sup>7</sup>Department of Farm Animals and Veterinary Public Health, University Clinic for Swine, University of Veterinary Medicine, Vienna, Austria; <sup>8</sup>Teagasc, Animal and Bioscience Research Department, Animal and Grassland Research Centre, Moorepark, Fermoy, Co. Cork, Ireland.

Running title: Porcine RFI-associated intestinal microbiota

#Address correspondence to: Gillian E. Gardiner, [ggardiner@wit.ie](mailto:ggardiner@wit.ie).

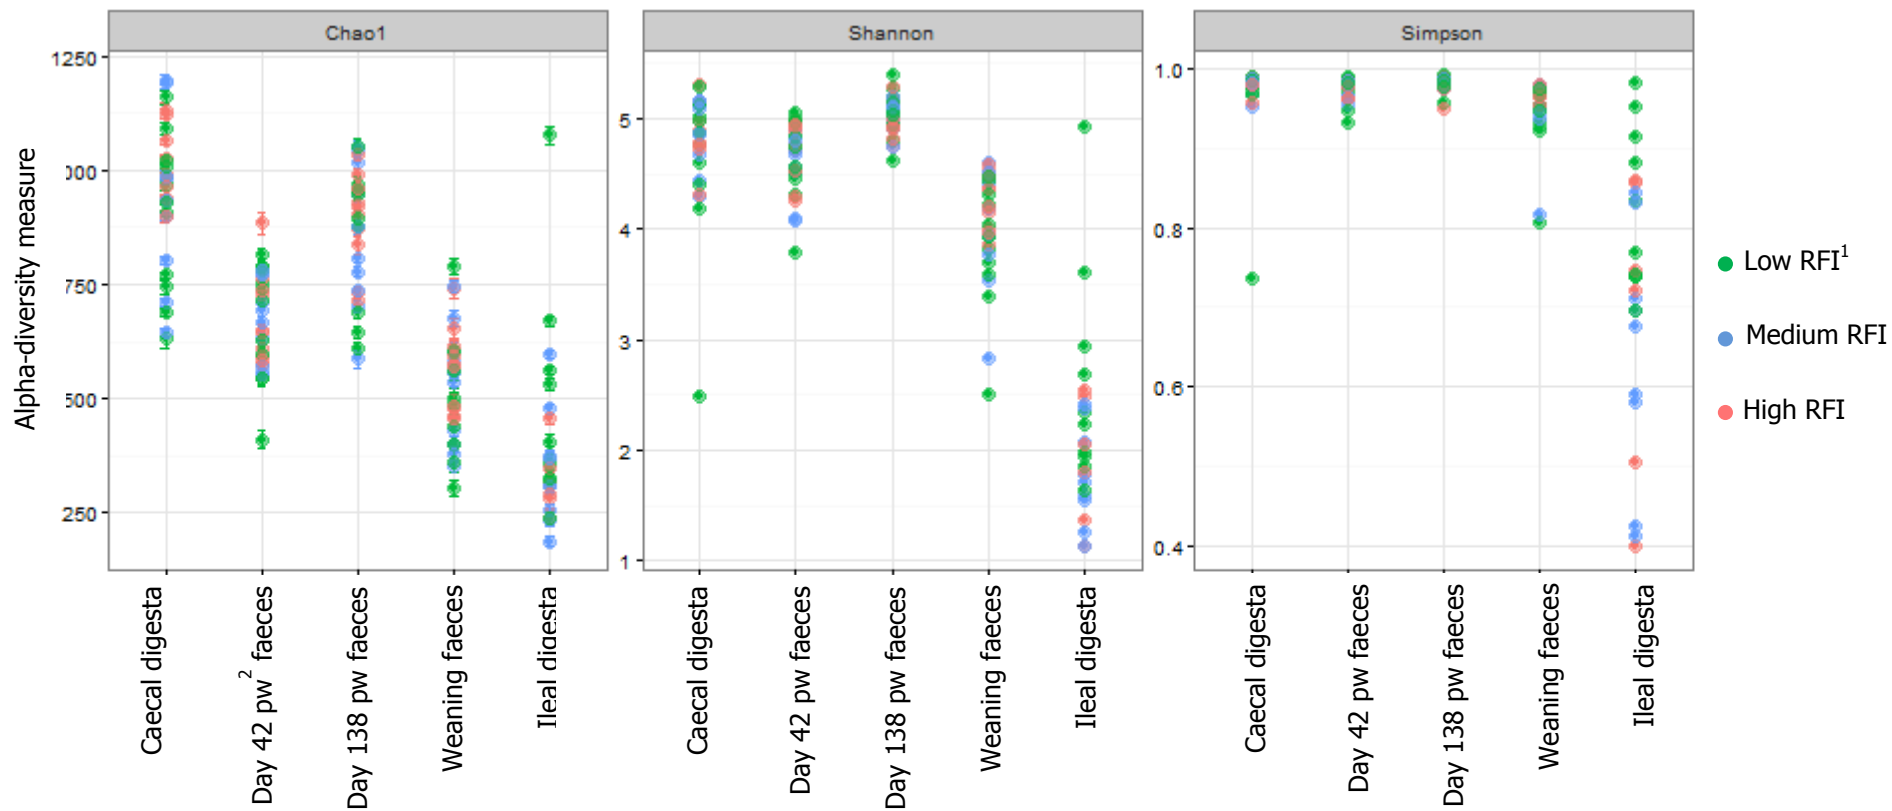

**Fig. S1.  $\alpha$ -diversity indices of the pig intestinal microbiota according to residual feed intake (RFI) rank and sample type (n=150) (colour coded by RFI rank).<sup>1</sup>RFI: residual feed intake; 2pw: post-weaning. Low RFI: faeces (n=36), digesta (caecal n=12, ileal n=9); medium RFI: faeces (n=30), digesta (caecal n=10, ileal n=9); high RFI: faeces (n=30), digesta (caecal n=8, ileal n=6).**

## A. Weaning faeces

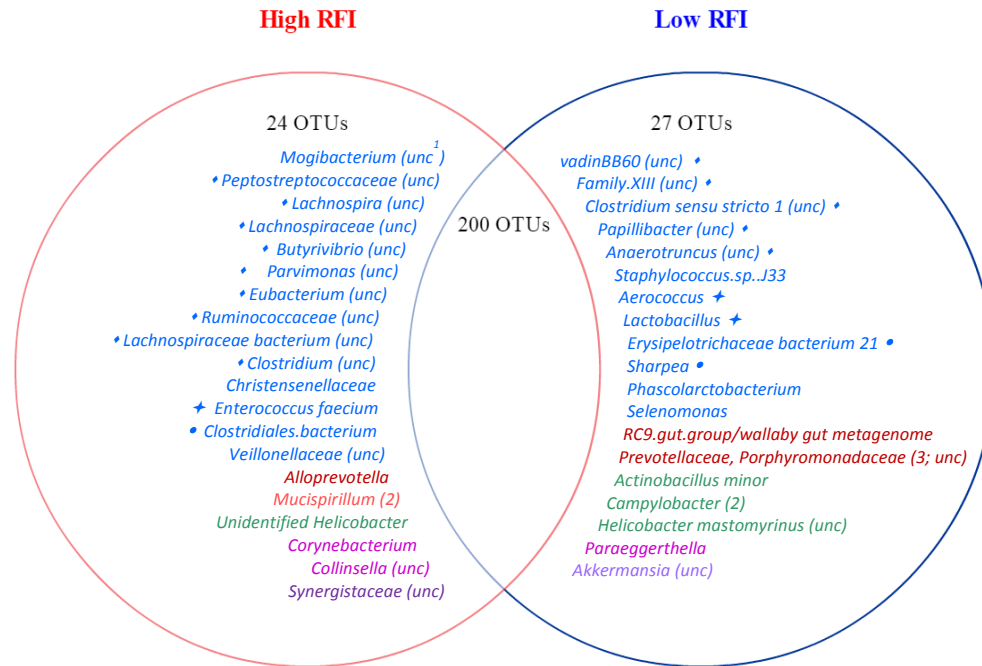

## B. Day 42 pw<sup>2</sup> faeces

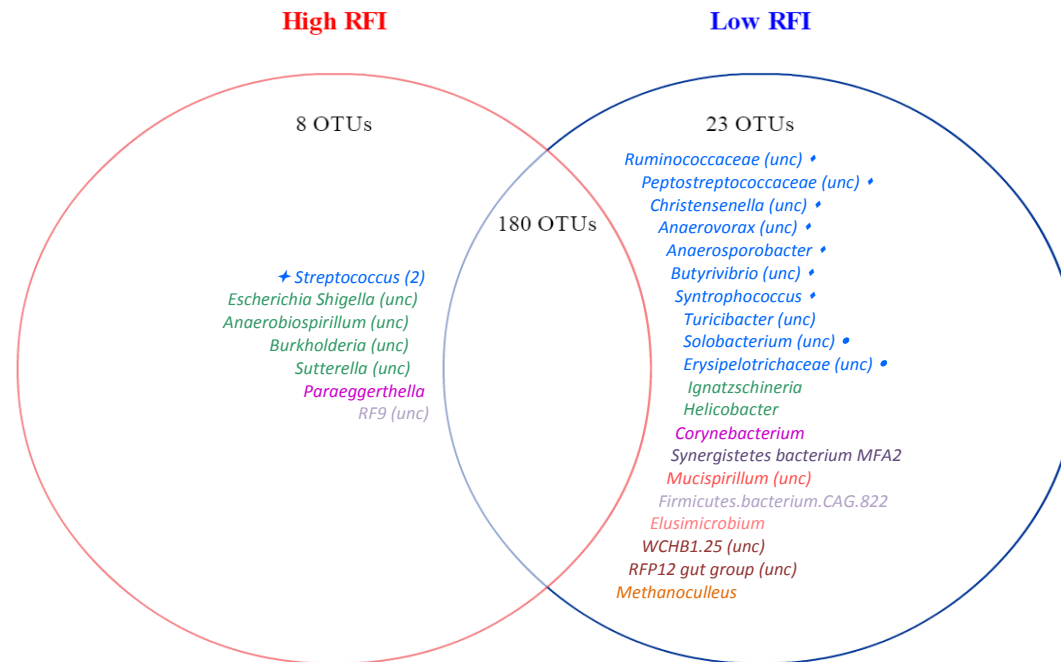

C. Day 138 pw faeces

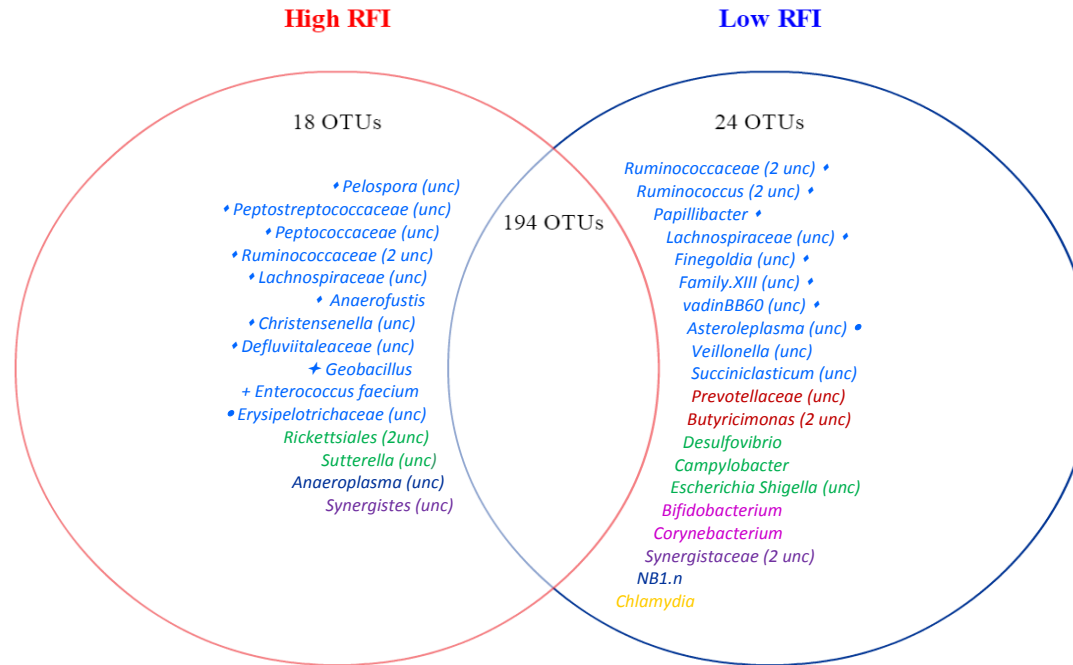

## D. Ileal digesta

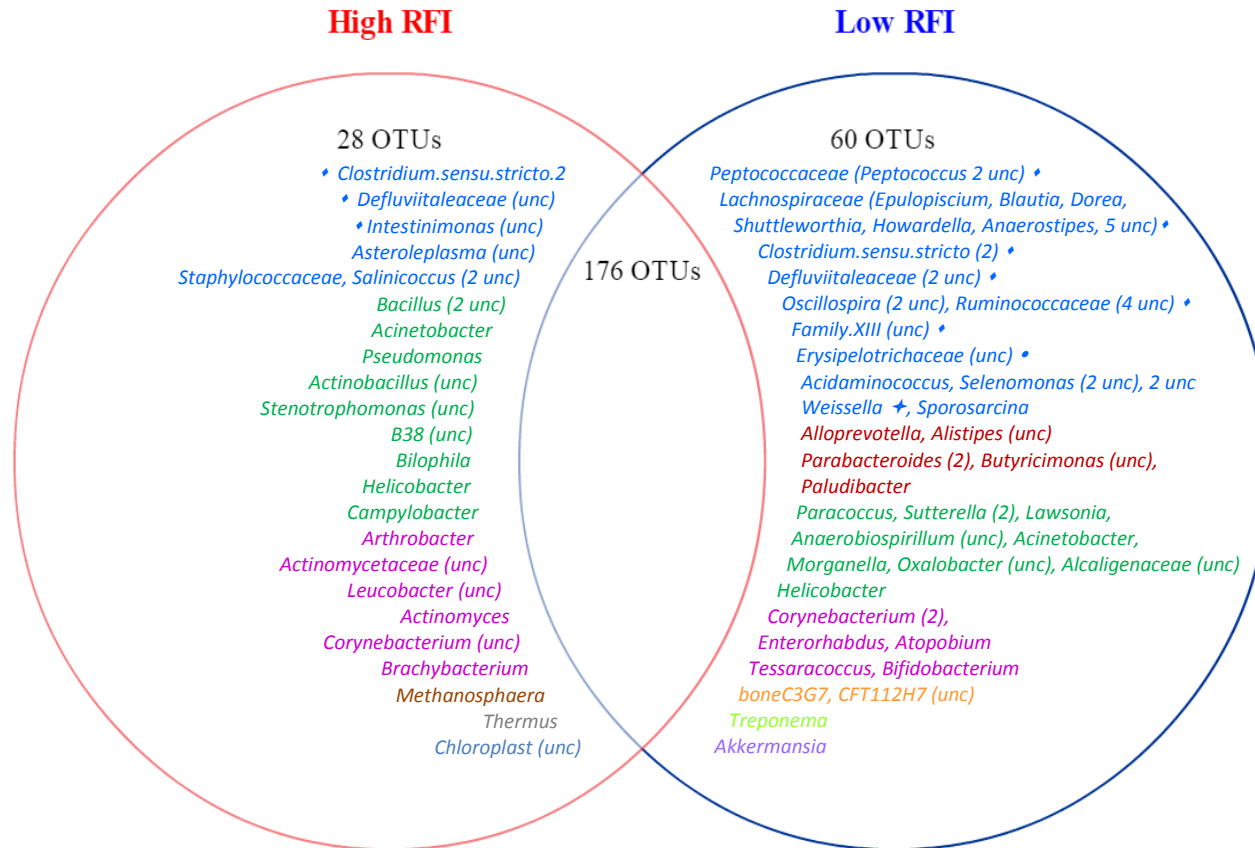

E. Caecal digesta

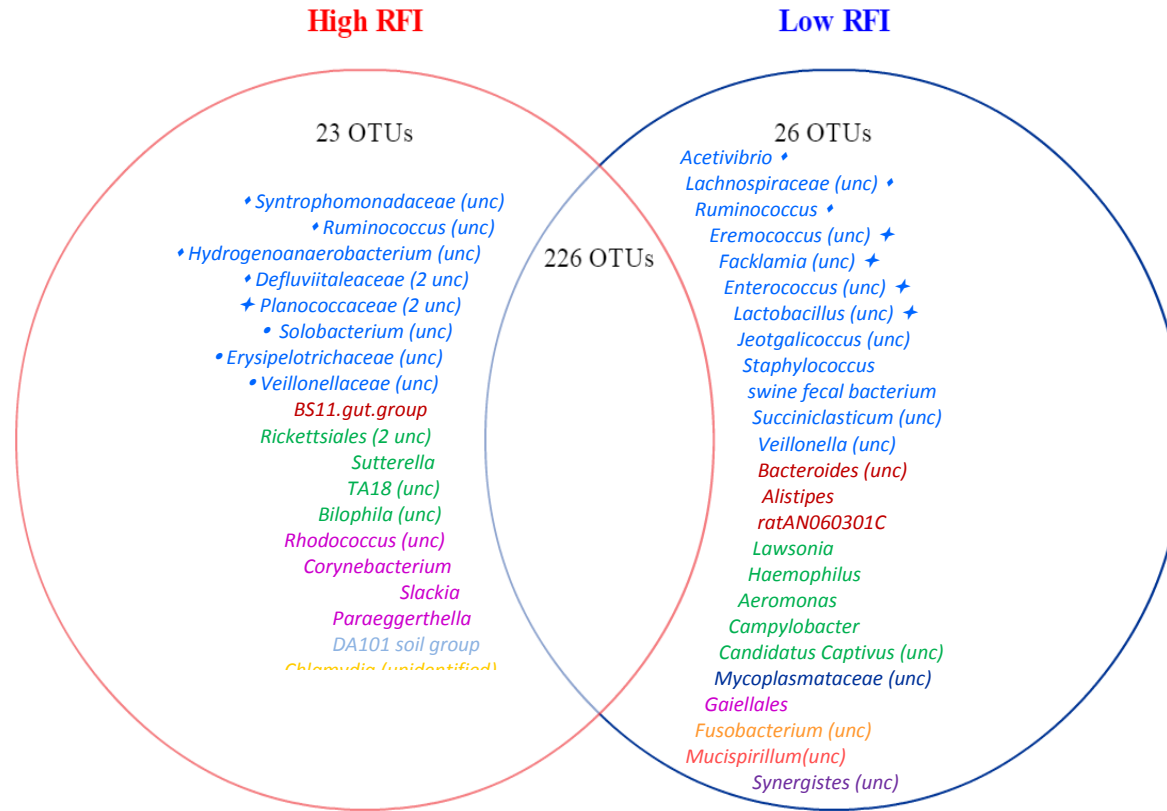

*Firmicutes* *Bacteroidetes* *Proteobacteria* *Actinobacteria* *Verrucomicrobia* *Deferribacteres*  
*Synergistetes* *Tenericutes* *Elusimicrobia* *Lentisphaerae* *Euryarchaeota* *Chlamydiae* *Fusobacteria*  
 Candidate division TM7 *Spirochaetae* *Cyanobacteria* *Deinococcus* *Thermus*

♦ *Clostridia/Clostridiales* ✦ *Bacilli/Lactobacillales* • *Erysipelotrichia/Erysipelotrichales*

**Fig. S2. OTUs found exclusively in either high or low residual feed intake (RFI)-ranked pigs across all faecal time points (A-C) and for both intestinal locations (D, E), as well as those shared across RFI ranks (80% of the OTUs were shared at weaning, 85% at day 42 pw, 82% at day 138 pw and in the caecal digesta and 66% in the ileal digesta).**

Low RFI: faeces (n=36), digesta (caecal n=12, ileal n=9); medium RFI: faeces (n=30), digesta (caecal n=10, ileal n=9); high RFI: faeces (n=30), digesta (caecal n=8, ileal n=6).

<sup>1</sup>unc: uncultured; <sup>2</sup>pw: post weaning. Numbers in parentheses denote the number of OTUs present for a given taxon where there was more than one.



**Table S1. Composition and chemical analysis of diets used in the study (on an as-fed basis; g/kg)**

| <b>Diet Type</b>                           | <b>Starter</b>   | <b>Link</b>      | <b>Weaner</b>    | <b>Finisher</b>  | <b>Pregnant sow</b> | <b>Lactating sow</b> |
|--------------------------------------------|------------------|------------------|------------------|------------------|---------------------|----------------------|
| Barley                                     |                  |                  | 248.0            | 385.4            | 897.4               | 349.5                |
| Wheat                                      | 220.0            | 399.0            | 431.4            | 404.0            |                     | 432.4                |
| Maize                                      | 80.0             |                  |                  |                  |                     |                      |
| Soya                                       | 163.5            | 229.2            | 200.0            | 175.0            | 70.0                | 150.0                |
| Full fat soya                              | 100.0            | 70.0             | 50.0             |                  |                     |                      |
| Lactofeed 70 <sup>1</sup>                  | 200.0            | 200.0            |                  |                  |                     |                      |
| Skim milk powder                           | 125.0            | 50.0             |                  |                  |                     |                      |
| Soya oil                                   | 78.1             | 25.0             | 40.0             | 10.0             | 10.0                | 40.0                 |
| Lysine HCl (78.8)                          | 4.73             | 3.70             | 4.6              | 4.0              | 1.0                 | 3.5                  |
| DL-Methionine                              | 3.22             | 2.33             | 1.7              | 1.0              |                     | 1.0                  |
| L-Threonine (98)                           | 2.41             | 1.62             | 2.0              | 1.5              |                     | 1.0                  |
| L-Tryptophan                               | 0.95             | 0.54             | 0.2              | 0.0              |                     |                      |
| Vitamin and mineral mix                    | 3.0 <sup>2</sup> | 3.0 <sup>2</sup> | 3.0 <sup>2</sup> | 1.0 <sup>3</sup> | 1.5 <sup>4</sup>    | 1.5 <sup>4</sup>     |
| Natuphos 5000 FTU/g <sup>5</sup>           | 0.10             | 0.10             | 0.1              | 0.1              | 0.1                 | 0.1                  |
| Salt feed grade                            | 3.00             | 3.00             | 3.0              | 3.0              | 4.0                 | 4.0                  |
| Dicalcium phosphate                        | 5.00             | 1.52             | 5.0              | 2.0              | 5.0                 | 5.0                  |
| Limestone flour                            | 11.00            | 11.0             | 11.0             | 13.0             | 11.0                | 12.0                 |
| <b>Chemical analysis (g/kg dry matter)</b> |                  |                  |                  |                  |                     |                      |
| Crude protein                              | 235.9            | 252.8            | 211.0            | 205.4            | 195.7               | 172.1                |
| Crude fibre                                | 19.8             | 23.4             | 34.8             | 37.5             | 38.9                | 31.7                 |
| Crude ash                                  | 66.2             | 63.5             | 48.3             | 45.4             | 44.6                | 49.8                 |
| Ether extract                              | 114.7            | 57.9             | 70.7             | 27.2             | 33.2                | 63.4                 |

|                                        |      |      |      |      |      |      |
|----------------------------------------|------|------|------|------|------|------|
| Digestible energy (MJ/kg) <sup>6</sup> | 17.9 | 17.0 | 16.9 | 16.0 | 15.9 | 16.3 |
| Net energy (MJ/kg) <sup>6</sup>        | 11.4 | 10.3 | 10.6 | 9.8  | 9.5  | 10.5 |
| <b>Amino acids (g/kg)</b>              |      |      |      |      |      |      |
| Lysine                                 | 16.2 | 15.0 | 13.0 | 11.1 | 6.4  | 9.9  |
| Methionine                             | 6.8  | 5.7  | 4.5  | 3.6  | 2.1  | 3.4  |
| Methionine + cysteine                  | 9.7  | 9.0  | 7.9  | 6.8  | 4.7  | 6.4  |
| Threonine                              | 10.5 | 9.8  | 8.7  | 7.5  | 4.5  | 6.5  |
| Tryptophan                             | 3.6  | 3.3  | 2.6  | 2.2  | 1.6  | 2.0  |

<sup>1</sup>Lactofeed 70 contains 70% lactose, 11.5% protein, 0.5% oil, 7.5% ash and 0.5% fibre (Volac, Cambridge, UK).

<sup>2</sup>Premix provided per kg of complete diet: Cu, 155 mg; Fe, 90 mg; Mn, 47 mg; Zn, 120 mg, I, 0.6 mg; Se, 0.3 mg; vitamin A, 6000 IU; vitamin D<sub>3</sub>, 1000 IU; vitamin E, 100 IU; vitamin K, 4 mg; vitamin B<sub>12</sub>, 15 µg; riboflavin, 2 mg; nicotinic acid, 12 mg; pantothenic acid, 10 mg; choline chloride, 250 mg; vitamin B<sub>1</sub>, 2 mg; vitamin B<sub>6</sub>, 3 mg; Endox, 60 g.

<sup>3</sup>Premix provided per kg of complete diet: Cu, 15 mg; Fe, 24 mg; Mn, 31 mg; Zn, 80 mg, I, 0.3 mg; Se, 0.2 mg; vitamin A, 2000 IU; vitamin D<sub>3</sub>, 500 IU; vitamin E, 40 IU; vitamin K, 4 mg; vitamin B<sub>12</sub>, 15 µg; riboflavin, 2 mg; nicotinic acid, 12 mg; pantothenic acid, 10 mg; vitamin B<sub>1</sub>, 2 mg; vitamin B<sub>6</sub>, 3 mg.

<sup>4</sup> Premix provided per kg of complete diet: Cu, 15 mg; Fe, 70 mg; Mn, 62 mg; Zn, 80 mg, I, 0.6 mg; Se, 0.2 mg; vitamin A, 1000 IU; vitamin D<sub>3</sub>, 1000 IU; vitamin E, 100 IU; vitamin K, 2 mg; vitamin B<sub>12</sub>, 15 µg; riboflavin, 5 mg; nicotinic acid, 12 mg; pantothenic acid, 10 mg; choline chloride, 500 mg; Biotin, 200 mg; Folic acid, 5 g; vitamin B<sub>1</sub>, 2 mg; vitamin B<sub>6</sub>, 3 mg.

<sup>5</sup>Phytase; 5000 FTU/g equal to 500 FTU per kg finished feed.

<sup>6</sup>Digestible energy and net energy were calculated from book values.

**Table S2. Effect of ranking pigs on residual feed intake (between weaning and day 126 post weaning) on salivary cortisol concentrations<sup>1</sup> and organ weights**

| Measure                   | High RFI           | Medium RFI         | Low RFI              | S.E.M <sup>2</sup> | P    |
|---------------------------|--------------------|--------------------|----------------------|--------------------|------|
| Salivary cortisol (ng/ml) | 4.8                | 4.1                | 4.5                  | 1.38               | 0.74 |
| Heart (g)                 | 476.5 <sup>A</sup> | 522.2 <sup>B</sup> | 482.3 <sup>A,B</sup> | 15.54              | 0.08 |
| Kidneys (g)               | 426.9              | 514.5              | 482.9                | 34.40              | 0.26 |
| Liver (g)                 | 2001.7             | 2054.4             | 2105.6               | 66.14              | 0.55 |
| Lungs (g)                 | 1152.6             | 1236.2             | 1130.7               | 56.01              | 0.38 |
| Stomach (g)               | 595.3              | 615.0              | 661.1                | 26.85              | 0.22 |
| Small intestine (g)       | 1453.5             | 1631.1             | 1595.7               | 112.73             | 0.54 |

High RFI: n=10, medium RFI: n=10, low RFI: n=12.

<sup>1</sup>Mean of data from days 135 and 138 post weaning; <sup>2</sup>Least square means and pooled standard error of means are presented. <sup>A,B,C</sup> Within each row, values that do not share a common superscript tend to be different ( $P \leq 0.10$ ).

**Table S3. Effect of ranking pigs on residual feed intake (between weaning and day 126 post weaning) on ileal morphology<sup>1</sup>**

| Measure                                          | High RFI          | Medium RFI        | Low RFI           | S.E.M <sup>2</sup> | P    |
|--------------------------------------------------|-------------------|-------------------|-------------------|--------------------|------|
| Villus height ( $\mu\text{m}$ )                  | 302.2             | 298.5             | 302.7             | 18.26              | 0.98 |
| Villus width ( $\mu\text{m}$ )                   | 116.8             | 117.6             | 153.3             | 15.89              | 0.18 |
| Crypt depth ( $\mu\text{m}$ )                    | 283.1             | 308.9             | 287.8             | 36.55              | 0.88 |
| Villus height : crypt depth                      | 1.13              | 0.94              | 1.37              | 0.16               | 0.18 |
| No. of goblet cells/villus                       | 19.6 <sup>a</sup> | 12.8 <sup>b</sup> | 12.1 <sup>b</sup> | 1.81               | 0.01 |
| No. of goblet cells/ $\mu\text{m}$ villus height | 0.06 <sup>a</sup> | 0.04 <sup>b</sup> | 0.04 <sup>b</sup> | 0.006              | 0.02 |

High RFI: n=10, medium RFI: n=10, low RFI: n=12.

<sup>1</sup>Ten villi were measured for each pig and the means were used for statistical analysis.

<sup>2</sup>Least square means and pooled standard error of means are presented.

<sup>a,b,c</sup> Within each row, values that do not share a common superscript are significantly different ( $P \leq 0.05$ ).

**Table S4. Effect of ranking pigs on residual feed intake (between weaning and day 126 post weaning) on total bacterial number ( $\log_{10}$  copies/ng total DNA) in faecal and intestinal samples**

| <b>Time point</b> | <b>High RFI</b> | <b>Medium RFI</b> | <b>Low RFI</b> | <b>S.E.M<sup>1</sup></b> | <b>P</b> |
|-------------------|-----------------|-------------------|----------------|--------------------------|----------|
| Faeces weaning    | 5.82            | 5.81              | 5.81           | 0.062                    | 0.99     |
| Faeces day 42 pw  | 6.22            | 6.18              | 6.19           | 0.066                    | 0.91     |
| Faeces day 138 pw | 6.14            | 6.23              | 6.18           | 0.061                    | 0.67     |
| Ileal digesta     | 5.06            | 5.14              | 5.27           | 0.158                    | 0.66     |
| Caecal digesta    | 5.99            | 5.79              | 5.75           | 0.163                    | 0.18     |

Low RFI: faeces (n=36), digesta (caecal n=12, ileal n=9); medium RFI: faeces (n=30), digesta (caecal n=10, ileal n=9); high RFI: faeces (n=30), digesta (caecal n=8, ileal n=6).

<sup>1</sup>Least square means and pooled standard error of means are presented.

<sup>A,B,C</sup> Within each row, values that do not share a common superscript tend to be different ( $P \leq 0.10$ ).

Supplementary Table S5. Relative abundance of OTUs statistically different<sup>1</sup> among RFI ranks

| Sample type       | OTU Taxonomy                                                                                                                 | Median relative abundance<br>[confidence interval] <sup>2</sup>                                        |                              |                              | P-value <sup>3</sup>         |                |               |      |
|-------------------|------------------------------------------------------------------------------------------------------------------------------|--------------------------------------------------------------------------------------------------------|------------------------------|------------------------------|------------------------------|----------------|---------------|------|
|                   |                                                                                                                              | High RFI (n=10)                                                                                        | Medium RFI (n=10)            | Low RFI (n=12)               | High vs Low                  | High vs Medium | Low vs Medium |      |
| Faeces weaning    | <i>Firmicutes;Clostridia;Clostridiales;Family.XIII; Mogibacterium;uncultured.bacterium</i>                                   | 0.0<br>[0.0;1e-05]                                                                                     | 3e-05<br>[1e-05;8e-05]       | 0.0<br>[0.0;0.0]             | 0.53                         | 0.06           | 0.04          |      |
|                   | <i>Firmicutes;Bacilli;Lactobacillales;Streptococcaceae; Streptococcus.;uncultured.bacterium</i>                              | 1e-05<br>[0.0;1e-04]                                                                                   | 0.0<br>[0.0;0.0]             | 4e-05<br>[2e-05;6e-05]       | 0.46                         | 0.16           | 0.02          |      |
|                   | <i>Bacteroidetes;Bacteroidia;Bacteroidales;Rikenellaceae; dgA.11.gut.group;uncultured.bacterium</i>                          | 0.00133<br>[0.00084;0.00397]                                                                           | 0.00018<br>[0.00005;0.00035] | 0.00145<br>[0.00045;0.00448] | 0.79                         | 0.03           | 0.03          |      |
|                   | <i>Bacteroidetes;Bacteroidia;Bacteroidales;Porphyromonadaceae; Parabacteroides;uncultured.bacterium</i>                      | 0.00896<br>[0.00401;0.01362]                                                                           | 0.01522<br>[0.01102;0.02123] | 0.00721<br>[0.00305;0.01178] | 0.74                         | 0.12           | 0.02          |      |
|                   | <i>Firmicutes;Clostridia;Clostridiales;Peptococcaceae; Peptococcus;uncultured.organism</i>                                   | 0.00006<br>[0.0;0.00013]                                                                               | 0.0<br>[0.0;0.0]             | 0.00000<br>[0.00;0.00002]    | 0.17                         | 0.05           | 0.18          |      |
|                   | <i>Candidate.division.TM7;Unknown.Class;Unknown.Order; Unknown.Family;Candidatus.Saccharimonas;uncultured.bacterium</i>      | 0.0<br>[0.0;0.00001]                                                                                   | 0.00015<br>[0.00003;0.00018] | 0.0<br>[0.0;0.00001]         | 0.90                         | 0.07           | 0.07          |      |
|                   | Faeces day 42 pw <sup>4</sup>                                                                                                | <i>Firmicutes;Clostridia;Clostridiales;Ruminococcaceae; Intestinimonas;uncultured.bacterium</i>        | 0.00001<br>[0.0;0.00003]     | 0.00005<br>[0.00004;0.00014] | 0.00002<br>[0.0;0.00009]     | 0.39           | 0.01          | 0.23 |
|                   |                                                                                                                              | <i>Bacteroidetes;Bacteroidia;Bacteroidales;Rikenellaceae; Alistipes;.bacterium</i>                     | 0.0<br>[0.0;0.00003]         | 0.00006<br>[0.00002;0.00014] | 0.00001<br>[0.0;0.00004]     | 0.38           | 0.03          | 0.16 |
|                   |                                                                                                                              | <i>Firmicutes;Negativicutes;Selenomonadales;Veillonellaceae; Selenomonas;uncultured.bacterium</i>      | 0.00191<br>[0.00107;0.00457] | 0.00041<br>[0.00010;0.00075] | 0.00083<br>[0.00031;0.00274] | 0.21           | 0.06          | 0.21 |
| Faeces day 138 pw |                                                                                                                              | <i>Firmicutes;Clostridia;Clostridiales;Lachnospiraceae; uncultured;uncultured.Firmicutes.bacterium</i> | 2e-05<br>[0e+00;3e-05]       | 0.0<br>[0.0;0.0]             | 0.0<br>[0e+00;1e-05]         | 0.12           | 0.01          | 0.12 |
|                   | <i>Firmicutes;Clostridia;Clostridiales;Clostridiaceae.1; Clostridium.sensu.stricto.1;uncultured.Clostridiaceae.bacterium</i> | 0.00017<br>[0.00011;0.00026]                                                                           | 0.00003<br>[0.00002;0.00008] | 0.00007<br>[0.00004;0.00015] | 0.20                         | 0.02           | 0.21          |      |
|                   | <i>Candidate.division.TM7;Unknown.Class;Unknown.Order; Unknown.Family;Candidatus.Saccharimonas;uncultured.bacterium</i>      | 0.00045<br>[0.00026;0.00077]                                                                           | 0.00044<br>[0.00027;0.00060] | 0.00015<br>[0.0;0.00028]     | <b>0.03</b>                  | 0.82           | 0.09          |      |
|                   | <i>Firmicutes;Clostridia;Clostridiales;Lachnospiraceae; Cellulosilyticum;uncultured.bacterium</i>                            | 0.00014<br>[0.00008;0.00026]                                                                           | 0.00064<br>[0.00038;0.00092] | 0.00060<br>[0.00026;0.00105] | <b>0.05</b>                  | 0.05           | 0.92          |      |
|                   | <i>Bacteroidetes;Bacteroidia;Bacteroidales;Bacteroidaceae;Bacteroides; uncultured.bacterium</i>                              | 0.00041<br>[0.00018;0.00108]                                                                           | 0.00142<br>[0.00104;0.00363] | 0.00175<br>[0.00062;0.00431] | <b>0.04</b>                  | 0.07           | 0.79          |      |
|                   | <i>Firmicutes;Clostridia;Clostridiales;Clostridiaceae.1; Clostridium.sensu.stricto.1;uncultured.bacterium</i>                | 0.08039<br>[0.05077;0.11418]                                                                           | 0.07249<br>[0.06478;0.08706] | 0.03572<br>[0.03190;0.06637] | <b>0.04</b>                  | 0.82           | 0.10          |      |
|                   | <i>Firmicutes;Clostridia;Clostridiales;vadinBB60;uncultured.organism;</i>                                                    | 0.00229<br>[0.00132;0.00317]                                                                           | 0.00209<br>[0.00115;0.00271] | 0.00513<br>[0.00302;0.00628] | <b>0.05</b>                  | 0.82           | 0.08          |      |

|                       |                                                                                                                                      |                               |                              |                              |              |          |      |
|-----------------------|--------------------------------------------------------------------------------------------------------------------------------------|-------------------------------|------------------------------|------------------------------|--------------|----------|------|
|                       | <i>Firmicutes; Clostridia; Clostridiales; Christensenellaceae; uncultured; uncultured.bacterium</i>                                  | 0.02067<br>[0.01509;0.03598]  | 0.03442<br>[0.01922;0.06740] | 0.05353<br>[0.03997;0.06825] | <b>0.04</b>  | 0.30     | 0.32 |
| <b>Caecal digesta</b> | <i>Firmicutes; Clostridia; Clostridiales; Ruminococcaceae; uncultured; uncultured.Clostridiales.bacterium</i>                        | 0.00013<br>[0.00009;0.00034]  | 0.00011<br>[0.00004;0.00022] | 0.0<br>[0.0;0.00003]         | <b>0.002</b> | 0.33     | 0.02 |
|                       | <i>Firmicutes; Erysipelotrichia; Erysipelotrichales; Erysipelotrichaceae; Solobacterium; uncultured.bacterium</i>                    | 0.00002<br>[0.0;0.00013]      | 0.0<br>[0.0;0.0]             | 0.0<br>[0.0;0.0]             | <b>0.01</b>  | 0.07     | 0.27 |
|                       | <i>Proteobacteria; Gammaproteobacteria; Pasteurellales; Pasteurellaceae; Actinobacillus; Actinobacillus.porcinus</i>                 | 0.0<br>[0.0;1e-05]            | 4e-05<br>[0.0;6e-05]         | 3e-05<br>[1e-05;8e-05]       | <b>0.04</b>  | 6.80E-02 | 0.89 |
| <b>Ileal Digesta</b>  | <i>Firmicutes; Clostridia; Clostridiales; Lachnospiraceae; uncultured; uncultured.Clostridiales.bacterium</i>                        | 0.0<br>[0.0;0.0]              | 0.0<br>[0.0;0.0]             | 2e-05<br>[0.0;1e-04]         | 0.08         | 0.22     | 0.02 |
|                       | <i>Euryarchaeota; Methanobacteria; Methanobacteriales; Methanobacteriaceae; Methanobrevibacter; uncultured.methanogenic.archaeon</i> | 1e-05<br>[0.0;2e-05]          | 5e-05<br>[3e-05;9e-05]       | 0.0<br>[0.0;1e-05]           | 0.15         | 0.15     | 0.02 |
|                       | <i>Firmicutes; Clostridia; Clostridiales; Ruminococcaceae; Oscillibacter; uncultured.bacterium</i>                                   | 0.00002<br>[0.00001;0.00004]  | 0.00009<br>[0.00006;0.00011] | 0.00010<br>[0.00005;0.00022] | <b>0.03</b>  | 0.01     | 0.93 |
|                       | <i>Actinobacteria; Actinobacteria; Corynebacteriales; Nocardiaceae; Rhodococcus; unidentified</i>                                    | 0.37417<br>[0.24461;0.54878]  | 0.42184<br>[0.09561;0.54106] | 0.11800<br>[0.03774;0.29465] | <b>0.04</b>  | 0.91     | 0.04 |
|                       | <i>Firmicutes; Clostridia; Clostridiales; Lachnospiraceae; Incertae.Sedis; Eubacterium.fissicatena</i>                               | 2e-05<br>[1e-05;2e-05]        | 0.0<br>[0.0;0.0]             | 1e-05<br>[0e+00;2e-05]       | 0.32         | 0.05     | 0.07 |
|                       | <i>Spirochaetae; Spirochaetes; Spirochaetales; Spirochaetaceae; Treponema; Treponema.berlinense</i>                                  | 0.0<br>[0.0;0.0]              | 0.0<br>[0.0;4e-05]           | 3e-05<br>[1e-05;4e-05]       | <b>0.02</b>  | 0.30     | 0.30 |
|                       | <i>Euryarchaeota; Methanobacteria; Methanobacteriales; Methanobacteriaceae; Methanosphaera; uncultured.archaeon</i>                  | 1e-05<br>[0.0;4e-05]          | 0.0<br>[0.0;0.0]             | 0.0<br>[0.0;0.0]             | <b>0.05</b>  | 0.18     | 0.18 |
|                       | <i>Firmicutes; Clostridia; Clostridiales; Lachnospiraceae; Anaerosporobacter; uncultured.bacterium</i>                               | 1e-05<br>[0.0;4e-05]          | 0.0<br>[0.0;0.0]             | 0.0<br>[0.0;2e-05]           | 0.77         | 0.03     | 0.03 |
|                       | <i>Firmicutes; Bacilli; Bacillales; Planococcaceae; uncultured; uncultured.bacterium</i>                                             | 0.00005<br>[<0.00001;0.00036] | 0.0<br>[0.0;0.0]             | 0.0<br>[0.0;<0.00001]        | 0.11         | 0.07     | 0.42 |

<sup>1</sup>Statistical significance at P≤0.05.

<sup>2</sup>The values presented are not percentages; differentially abundant OTUs for which median relative abundance was less than 0.00001 are not presented.

<sup>3</sup>P-values in bold correspond to statistical differences between high and low RFI pigs.

<sup>4</sup>pw: post-weaning.

**Table S6. Effect of ranking pigs on residual feed intake (between weaning and day 126 post weaning) on pH and volatile fatty acid (VFA) concentrations ( $\mu\text{mol/g}$ ) in faeces at weaning, day 42 and day 138 post weaning**

| Measure            | Weaning             |                   |                   |                    |      | Day 42 post weaning |            |         |       |      | Day 138 post weaning |            |         |       |      |
|--------------------|---------------------|-------------------|-------------------|--------------------|------|---------------------|------------|---------|-------|------|----------------------|------------|---------|-------|------|
|                    | High RFI            | Medium RFI        | Low RFI           | S.E.M <sup>1</sup> | P    | High RFI            | Medium RFI | Low RFI | S.E.M | P    | High RFI             | Medium RFI | Low RFI | S.E.M | P    |
| pH                 | 6.7                 | 6.9               | 6.8               | 0.081              | 0.67 | 6.3                 | 6.4        | 6.4     | 0.09  | 0.81 | 6.6                  | 6.4        | 6.7     | 0.08  | 0.56 |
| Total <sup>2</sup> | 94                  | 79                | 104               | 12.7               | 0.25 | 114                 | 133        | 102     | 13.2  | 0.19 | 98                   | 101        | 100     | 11.3  | 0.97 |
| Acetic             | 26.3                | 23.2              | 30.9              | 3.59               | 0.24 | 36.9                | 44.4       | 33.9    | 4.20  | 0.17 | 35.0                 | 36.6       | 39.2    | 4.02  | 0.73 |
| Propionic          | 27.2 <sup>A,B</sup> | 22.0 <sup>B</sup> | 33.3 <sup>A</sup> | 4.19               | 0.09 | 34.2                | 42.2       | 30.9    | 4.51  | 0.14 | 30.0                 | 31.3       | 29.9    | 3.82  | 0.94 |
| Butyric            | 13.0                | 10.3              | 12.2              | 2.27               | 0.67 | 23.2                | 24.5       | 19.7    | 3.42  | 0.53 | 15.2                 | 15.8       | 15.1    | 2.35  | 0.97 |
| Valeric            | 7.0                 | 6.0               | 8.2               | 1.12               | 0.25 | 7.2                 | 7.6        | 6.0     | 0.92  | 0.28 | 5.0                  | 5.3        | 4.9     | 0.67  | 0.87 |
| Isovaleric         | 13.3                | 9.8               | 10.8              | 1.83               | 0.39 | 7.6                 | 8.8        | 7.1     | 1.03  | 0.42 | 7.7                  | 7.5        | 7.1     | 0.98  | 0.88 |
| Isobutyric         | 7.1                 | 6.3               | 7.8               | 1.15               | 0.57 | 4.4                 | 5.1        | 4.1     | 0.62  | 0.42 | 4.5                  | 4.4        | 4.2     | 0.59  | 0.93 |

High RFI: n=10, medium RFI: n=10, low RFI: n=12.

<sup>1</sup>Least square means and pooled standard error of the mean are presented.

<sup>2</sup>Total: Sum of measured acids.

<sup>a,b,c</sup> Within each row, values that do not share a common superscript are significantly different ( $P \leq 0.05$ ).



**Table S7. Effect of ranking pigs on residual feed intake (between weaning and day 126 post weaning) on pH and volatile fatty acid (VFA) concentrations ( $\mu\text{mol/g}$ ) in ileal and caecal digesta at slaughter (day 139 post-weaning)**

| Measure            | Ileal digesta      |                    |                  |                    |      | Caecal digesta |            |         |       |      |
|--------------------|--------------------|--------------------|------------------|--------------------|------|----------------|------------|---------|-------|------|
|                    | High RFI           | Medium RFI         | Low RFI          | S.E.M <sup>1</sup> | P    | High RFI       | Medium RFI | Low RFI | S.E.M | P    |
| pH                 | 6.8                | 6.7                | 6.7              | 0.09               | 0.55 | 6.6            | 6.7        | 6.7     | 0.09  | 0.37 |
| Total <sup>2</sup> | 47                 | 45                 | 53               | 8.1                | 0.73 | 111            | 96         | 86      | 14.5  | 0.50 |
| Acetic             | 25.9               | 21.0               | 31.1             | 4.37               | 0.22 | 40.0           | 33.6       | 33.6    | 5.39  | 0.65 |
| Propionic          | 7.4                | 9.2                | 10.8             | 2.24               | 0.51 | 38.8           | 32.6       | 31.1    | 7.16  | 0.73 |
| Butyric            | 3.8                | 5.4                | 8.3              | 1.51               | 0.14 | 18.5           | 17.2       | 12.6    | 3.36  | 0.46 |
| Valeric            | 2.3                | 2.5                | 2.6              | 0.46               | 0.84 | 5.2            | 5.0        | 3.9     | 0.78  | 0.40 |
| Isovaleric         | 4.8 <sup>a,b</sup> | 3.4 <sup>b</sup>   | 7.2 <sup>a</sup> | 0.96               | 0.02 | 5.5            | 4.7        | 3.9     | 0.81  | 0.34 |
| Isobutyric         | 1.5 <sup>b</sup>   | 2.6 <sup>a,b</sup> | 3.5 <sup>a</sup> | 0.55               | 0.04 | 3.2            | 2.8        | 2.4     | 0.57  | 0.57 |

High RFI: caecal n=8, ileal n=6; medium RFI: caecal n=10, ileal n=9; low RFI: caecal n=12, ileal n=9.

<sup>1</sup>Least square means and pooled standard error of the mean are presented.

<sup>2</sup>Total: sum of measured acids.

<sup>a,b,c</sup> Within each row, values that do not share a common superscript are significantly different ( $P \leq 0.05$ ).
